# Supplementary material for: miR-221-5p-Mediated Downregulation of JNK2 Aggravates Acute Lung Injury
Source: Front Immunol. 2021 Nov 25;12:700933. doi: 10.3389/fimmu.2021.700933 (PMC8656235; doi:10.3389/fimmu.2021.700933)
Supplement: Supplementary file 2 [file Table_1.xlsx]

## Sheet: LPS_4hvsLPS_0h.DE
sRNA	LPS_4h	LPS_0h	log2.Fold_change.	p.value	q.value.Storey.et.al..2003.
mmu-miR-146a-5p	15806.3	4813.51	1.7153	0	0
mmu-miR-146b-5p	10662.9	4067.47	1.3904	0	0
mmu-miR-155-5p	6031.05	445.968	3.7574	0	0
mmu-miR-221-3p	17848.8	8169.95	1.1274	0	0
mmu-miR-222-3p	12982.8	5955.15	1.1244	0	0
mmu-miR-221-5p	4560.4	1557.51	1.5499	1.4208e-241	5.8455e-240
mmu-miR-155-3p	349.801	5.83568	5.9055	5.8647e-78	1.6086e-76
mmu-miR-222-5p	701.148	202.406	1.7925	2.0751e-49	4.781e-48
mmu-miR-146b-3p	65.5683	4.60711	3.8311	2.0382e-13	3.3542e-12
mmu-miR-21a-3p	102.992	20.2713	2.345	2.9677e-12	4.4983e-11
mmu-miR-301b-5p	37.4234	93.0637	-1.3143	4.3328e-09	4.7995e-08
mmu-miR-25-5p	24.4335	53.4425	-1.1291	5.1762e-05	0.0004029
mmu-miR-195a-3p	41.4441	11.3642	1.8667	0.00020262	0.0014963
mmu-miR-146a-3p	13.9178	0	4.5019	0.00034845	0.0024778
